# Supplementary material
Source: Elsevier journal article supplement (https://www.sciencedirect.com/science/article/pii/S0122726220300355)
Supplement: mmc2 [file S0122726220300355:mmc2.pdf]

| SYRCLE - Estudios en Animales. | Características Basales | Ocultación de Asignación | "Random Housing" | Enmascaramiento Selección. | Aleatorización del desenlace. | Enmascaramiento Detección. |
|--------------------------------|-------------------------|--------------------------|------------------|----------------------------|-------------------------------|----------------------------|
| Liu & Zhang (30)               | ?                       |                          | ?                |                            | ?                             |                            |
| Hotchkiss (32)                 | ?                       |                          | ?                |                            | ?                             |                            |
| Whelan (31)                    | ?                       |                          | ?                |                            | ?                             |                            |
| Waltz (34)                     | ?                       |                          | ?                |                            | ?                             |                            |
| Lado-Abeal (39)                | ?                       |                          | ?                |                            | ?                             |                            |

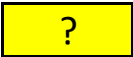

Riesgo no claro

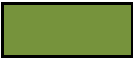

Bajo riesgo de sesgos

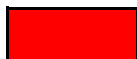

Alto riesgo de sesgo

| <i>Datos incompletos</i> | <i>Reporte Selectivo de los Desenlaces</i> | <i>Generación de secuencia</i> | <i>Otras fuentes de sesgo.</i> |
|--------------------------|--------------------------------------------|--------------------------------|--------------------------------|
| ?                        |                                            |                                | ?                              |
| ?                        |                                            |                                | ?                              |
| ?                        |                                            |                                | ?                              |
| ?                        |                                            |                                | ?                              |
| ?                        |                                            |                                | ?                              |

Altman - Estudios en Humanos

|                 | <i>muestra de pacientes</i> | <i>seguimiento de los pacientes</i> |
|-----------------|-----------------------------|-------------------------------------|
| Langley (35)    |                             | ?                                   |
| Mickiewicz (38) |                             | ?                                   |
| Fedtocheva (39) |                             | ?                                   |
| Liu (37)        |                             | ?                                   |
| Cambiaghi (36)  |                             | ?                                   |

?

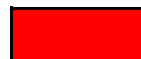

| <i>resultado evaluado</i> | <i>variable que marca el pronóstico</i> | <i>análisis de los datos</i> | <i>tratamiento subsiguiente a la inclusión en la cohorte</i> | <i>COMENTARIOS</i>                                                                                                                                                                                                         |
|---------------------------|-----------------------------------------|------------------------------|--------------------------------------------------------------|----------------------------------------------------------------------------------------------------------------------------------------------------------------------------------------------------------------------------|
|                           |                                         |                              |                                                              | El muestreo fue por conveniencia, poco tiempo de seguimiento.                                                                                                                                                              |
|                           |                                         |                              |                                                              | El muestreo fue por conveniencia, poco tiempo de seguimiento.                                                                                                                                                              |
|                           |                                         | ?                            | ?                                                            | El muestreo fue por conveniencia, poco tiempo de seguimiento, no tuvo ajuste estadístico para otros factores pronósticos importantes, no detalla el tratamiento en la población y no especifica el origen de la infección. |
|                           |                                         | ?                            |                                                              | El muestreo fue por conveniencia, poco tiempo de seguimiento, no tuvo ajuste estadístico para otros factores pronósticos importantes.                                                                                      |
|                           |                                         | ?                            |                                                              | El muestreo fue por conveniencia, poco tiempo de seguimiento.                                                                                                                                                              |

Riesgo no claro

Bajo riesgo de sesgos

Alto riesgo de sesgo
